# Supplementary material for: Comparative Models of Biological and Social Pathways to Predict Child Growth through Age 2 Years from Birth Cohorts in Brazil, India, the Philippines, and South Africa
Source: PubMed Central journal article supplement (PMC6075183; doi:10.1093/jn/nxy101), 2018-07-13
Supplement: nxy101_supplement_file.pdf [file nxy101_supplement_file.pdf]

**SUPPLEMENTAL TABLE 1.** Differences in means between cases included and excluded

|                                         | HAZ<br>present<br>Mean <sup>2</sup> | HAZ<br>missing<br>Mean <sup>2</sup> | Cohen's d <sup>1</sup> |
|-----------------------------------------|-------------------------------------|-------------------------------------|------------------------|
| Maternal schooling                      | 6.6                                 | 5.9                                 | 0.17                   |
| Paternal schooling                      | 6.9                                 | 5.4                                 | 0.40                   |
| Income quintile                         | 3.0                                 | 2.4                                 | 0.40                   |
| Social class                            | 2.2                                 | 1.7                                 | 0.36                   |
| Toilet type                             | 1.4                                 | 1.4                                 | 0.03                   |
| Access to safe water                    | 1.4                                 | 1.4                                 | 0.08                   |
| Use of health services                  | 1.0                                 | 1.0                                 | 0.09                   |
| Child dependency ratio                  | 1.3                                 | 1.3                                 | 0.01                   |
| Crowding ratio                          | 0.4                                 | 0.4                                 | 0.10                   |
| Birth order                             | 0.6                                 | 0.6                                 | 0.01                   |
| Maternal age at birth of<br>index child | 26.0                                | 24.8                                | 0.20                   |
| wazwho <sup>3</sup>                     | -0.2                                | -0.7                                | 0.36                   |
| Matht                                   | 156.5                               | 156.0                               | 0.09                   |

<sup>1</sup> 0.2 is "small", 0.5 is "medium", 0.8 is "large"

<sup>2</sup> Units defined in Methods

<sup>3</sup> Wazwho0 = weight-for-age z-score WHO standards

<sup>4</sup> Matht = Maternal height

**SUPPLEMENTAL TABLE 2.** Model fit statistics of measurement and path models across four sites, using one-third “hold-out” sample

| <b>Model fit statistics</b>     | <b>RMSEA</b> | <b>CFI</b> | <b>TLI</b> | <b>R-squared (SE)</b> |
|---------------------------------|--------------|------------|------------|-----------------------|
| Measurement models <sup>1</sup> |              |            |            |                       |
| Factor 1                        | 0.03         | 1.00       | 1.00       |                       |
| Factor 2                        | 0.00         | 1.00       | 1.00       |                       |
| Factor 3                        | 0.04         | 0.99       | 0.97       |                       |
| Path models <sup>1</sup>        |              |            |            |                       |
| Brazil                          | 0.07         | 1.00       | 0.93       | 0.38 (0.02)           |
| India                           | 0.00         | 1.00       | 1.00       | 0.36 (0.03)           |
| Philippines                     | 0.01         | 1.00       | 0.99       | 0.25 (0.03)           |
| South Africa                    | 0.03         | 0.98       | 0.96       | 0.17 (0.05)           |
| Pooled weighted                 | 0.021        | 1.00       | 0.98       | 0.40 (0.01)           |

<sup>1</sup> Model fit criteria were all good (RMSEA  $\leq$  0.05, CFI  $\geq$  0.95 and TLI  $\geq$  0.95), except for RMSEA and TLI for the path model of Brazil, which were fair (RMSEA = 0.07, CFI  $\geq$  0.95, TLI = 0.93).

# ONLINE SUPPORTING MATERIAL

Panel A - Brazil

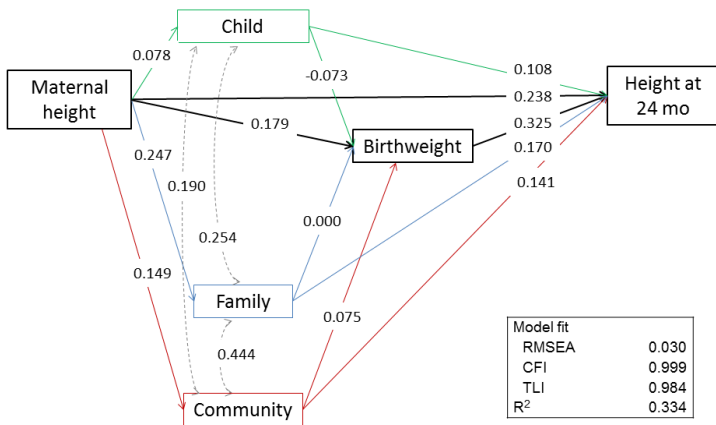

Panel B - India

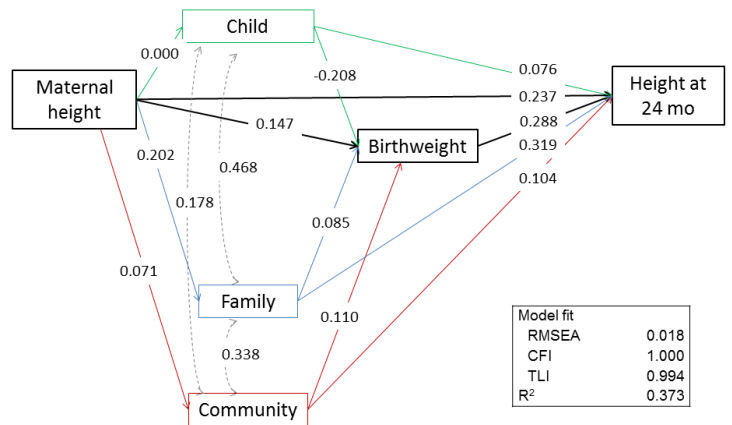

Panel C - Philippines

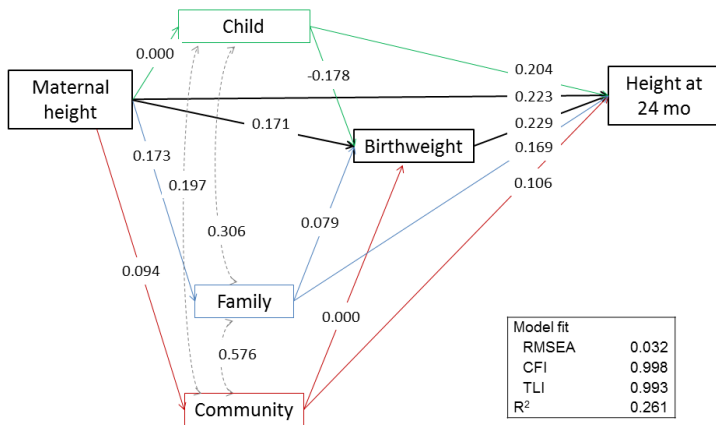

Panel D - South Africa

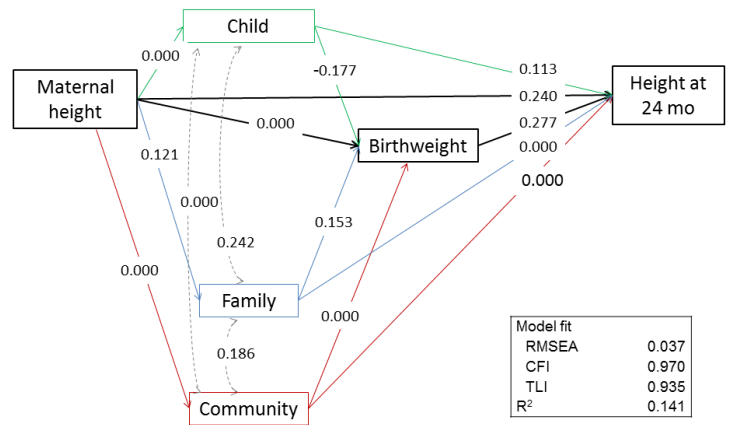

Panel E - Pooled across sites

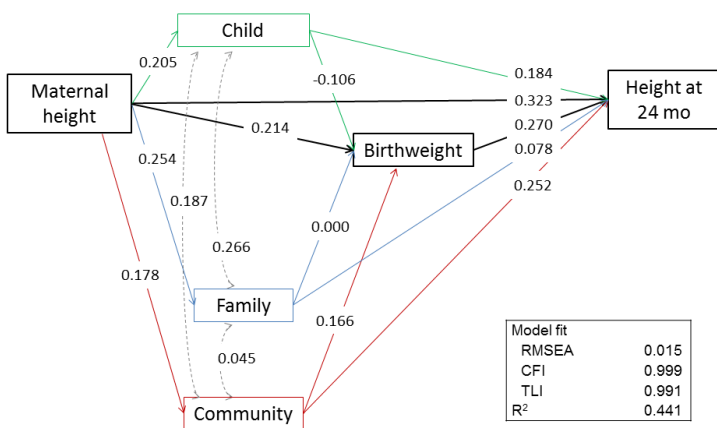

**SUPPLEMENTAL FIGURE 1.** Panels A to E: Pathways to child height at 24 months in Brazil, India, Philippines, South Africa and pooled across sites.
